# Supplementary material for: In situ Raman scattering investigation of crystal phase transition in isotactic polybutene-1
Source: Royal Society of Chemistry journal article supplement (doi:10.1039/d5ce00329f), 2025-01-01
Supplement: d5ce00329f1.pdf [file d5ce00329f1.pdf]

## In situ Raman scattering investigated transition in isotactic polybutene-1

Jiangqing Li<sup>1</sup>, Lekang Zhang<sup>1</sup>, Lars Rosgaard Jensen<sup>2</sup>, Donghong Yu<sup>3</sup>, Jesper de Claville  
Christiansen<sup>2</sup>, Shichun Jiang<sup>\*1</sup>

<sup>1</sup>School of Materials Science and Engineering, Tianjin University, Tianjin 300072, PR China

<sup>2</sup>Department of Materials and Production, Aalborg University, DK-9220, Aalborg East,  
Denmark

<sup>3</sup>Department of Chemistry and Bioscience, Aalborg University, DK-9220, Aalborg East,

\* Corresponding author: [scjiang@tju.edu.cn](mailto:scjiang@tju.edu.cn)

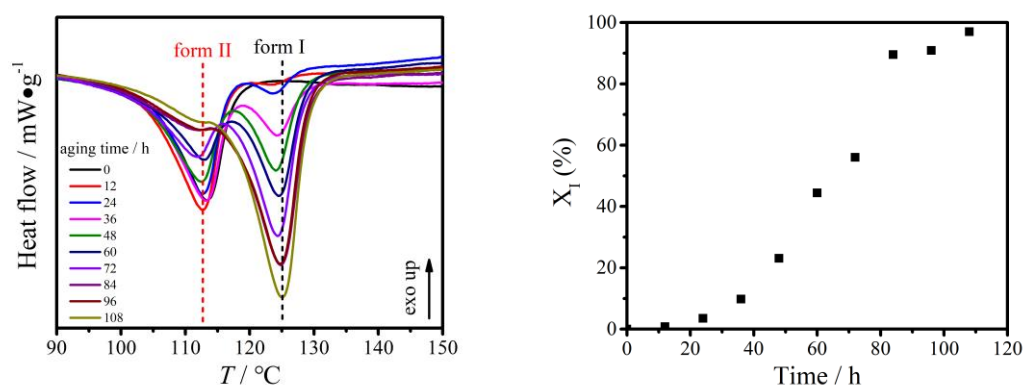

Figure S1

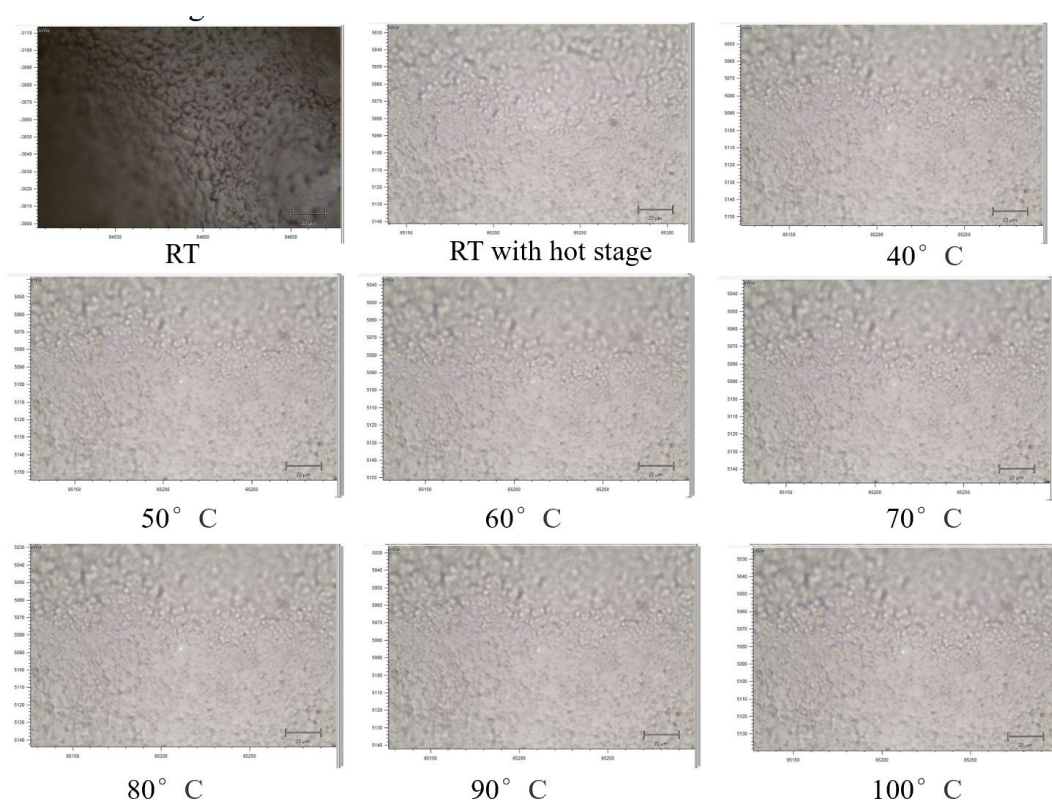

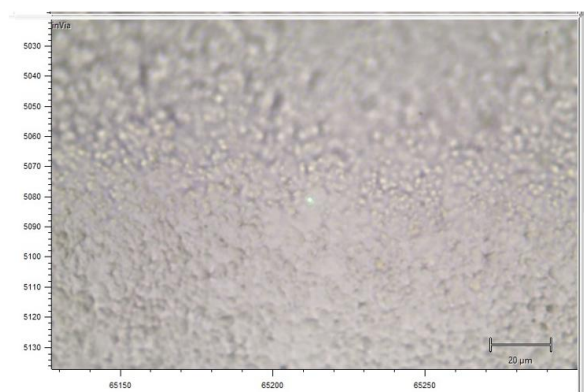

110° C

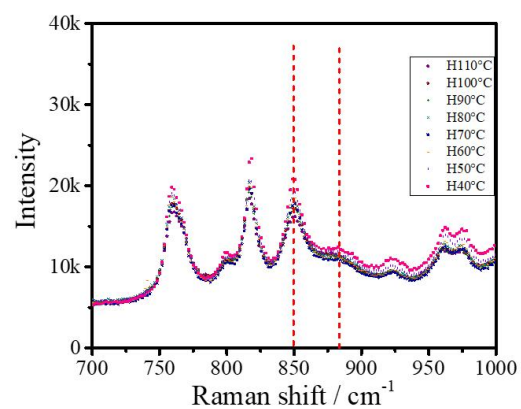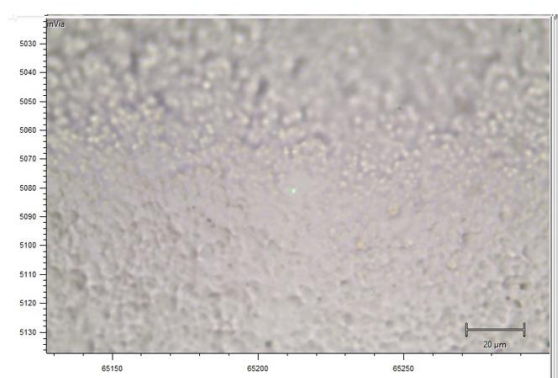

120° C

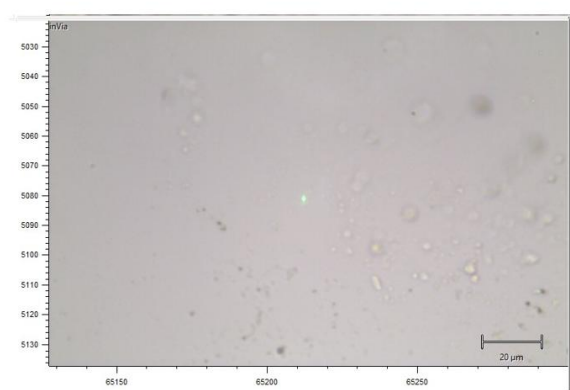

130° C

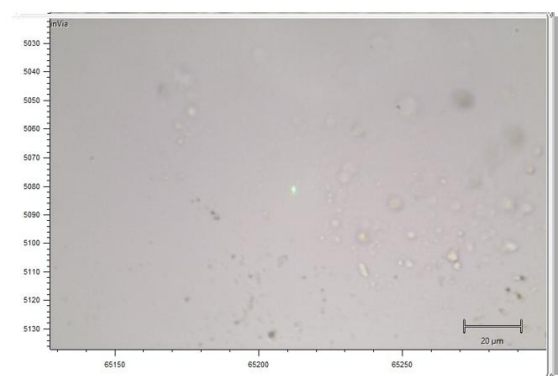

140° C

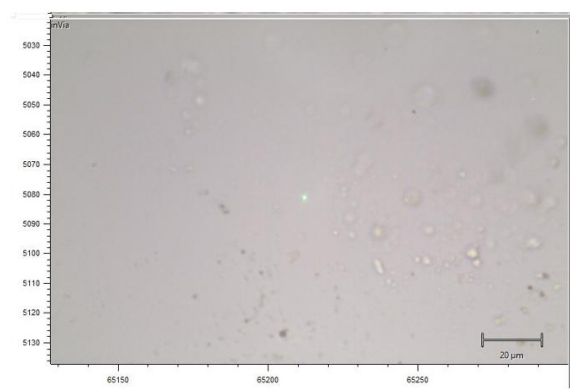

150° C

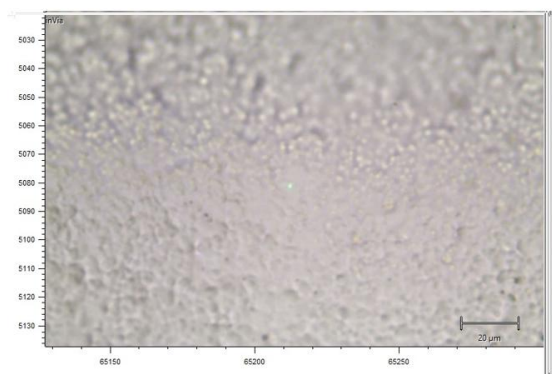

120° C

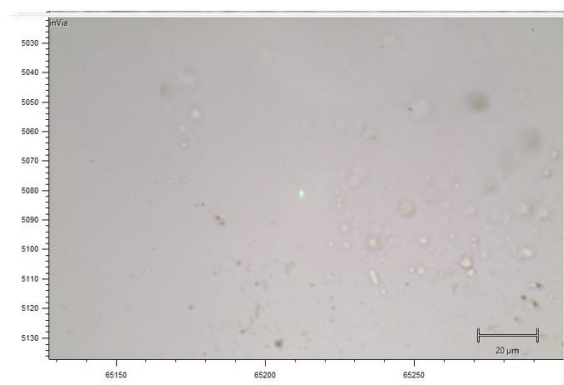

130° C

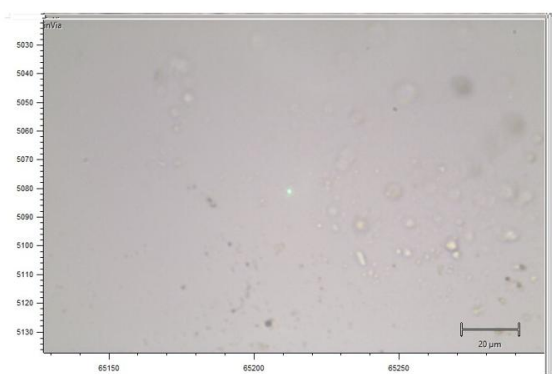

150° C

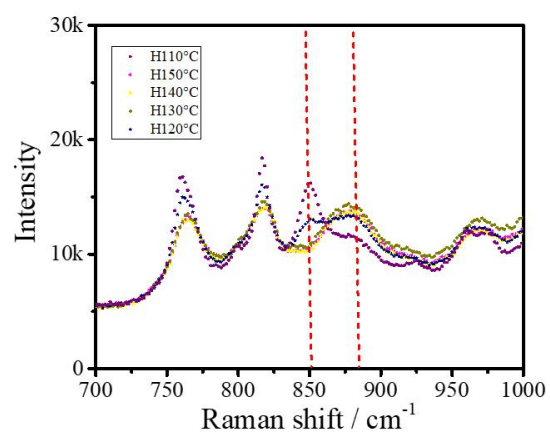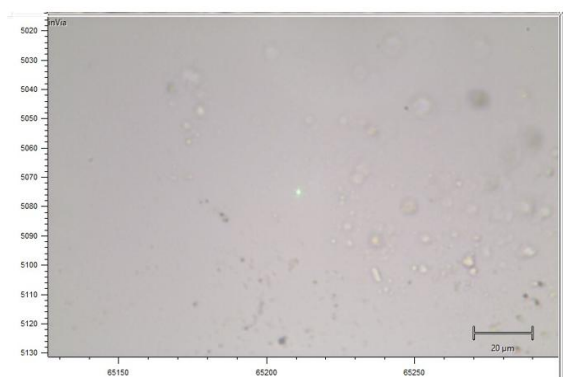

160° C

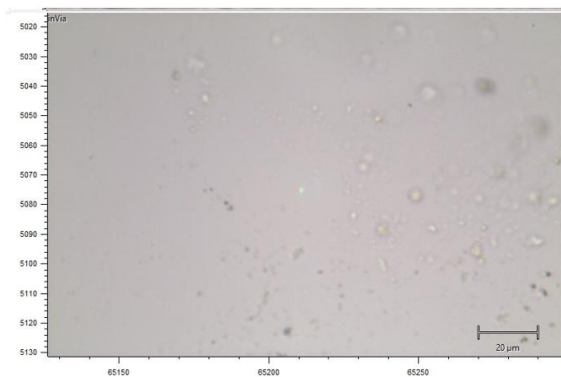

170° C

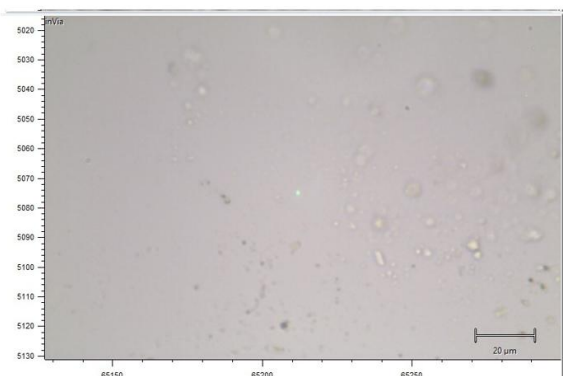

180° C

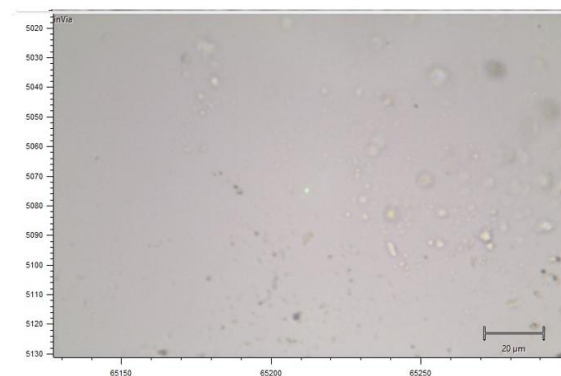

190° C

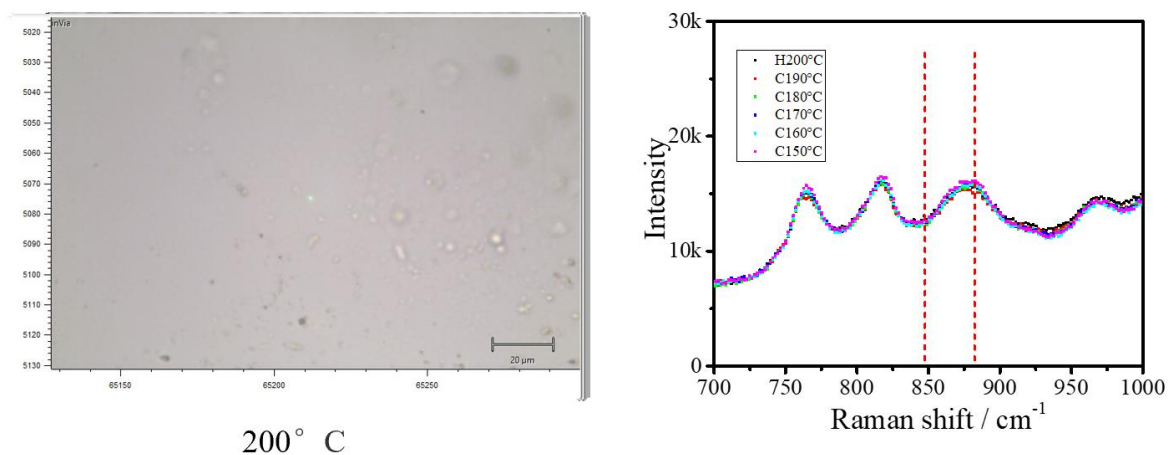

Figure S2 Images and corresponding Raman spectra within the helical sensitive vibrational band range of iPB-1 during heating

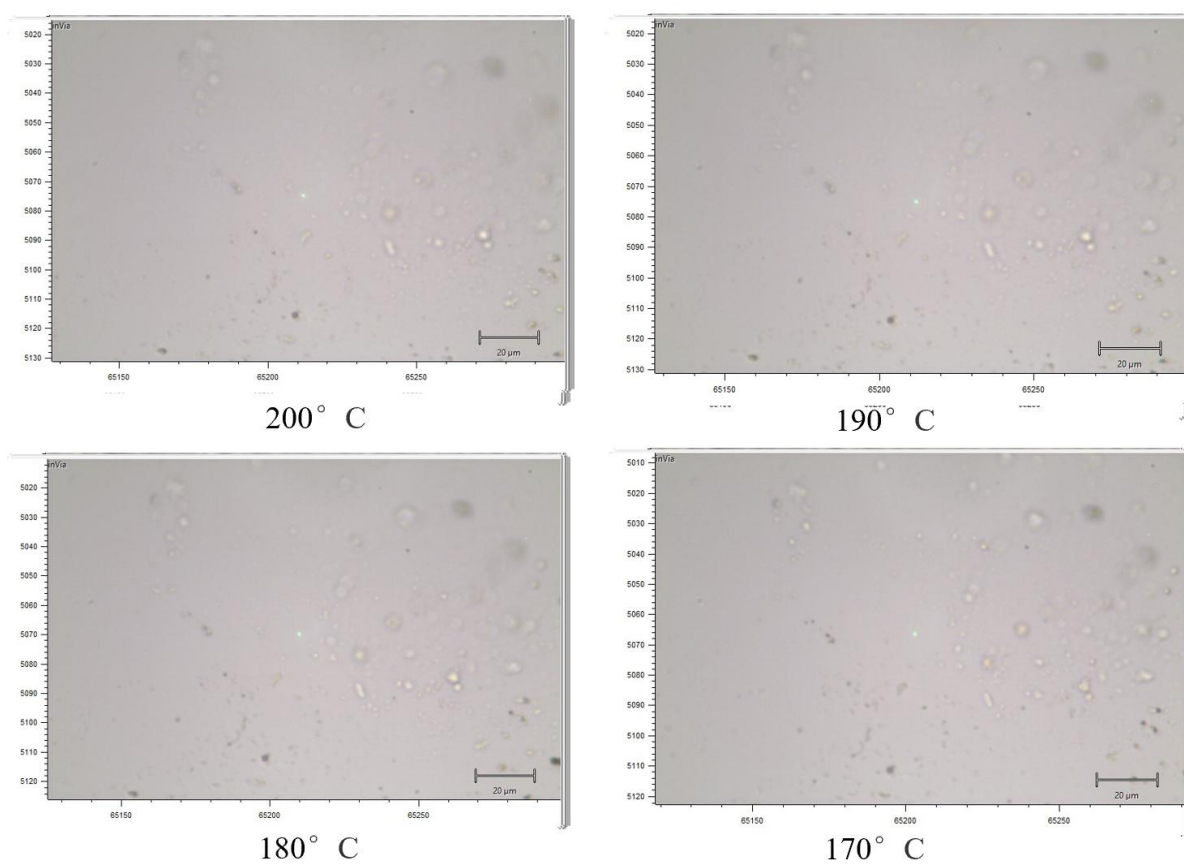



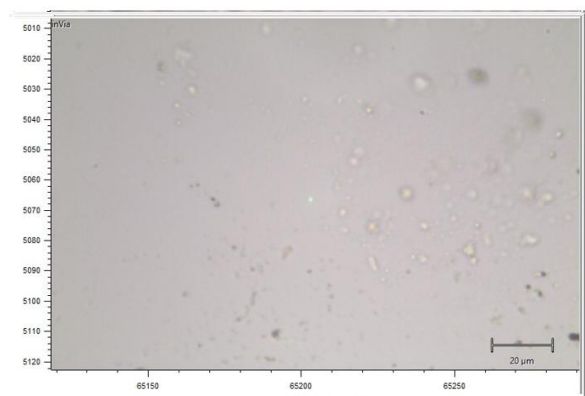

160° C

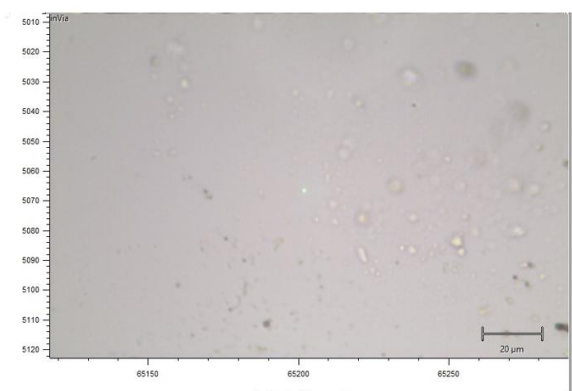

150° C

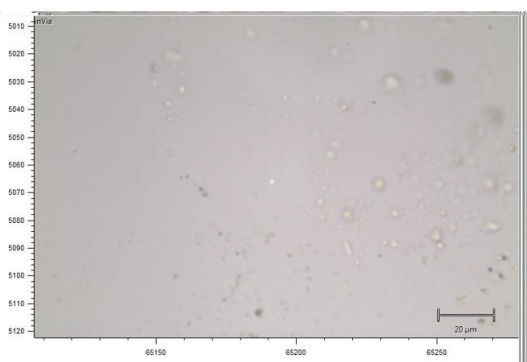

140° C

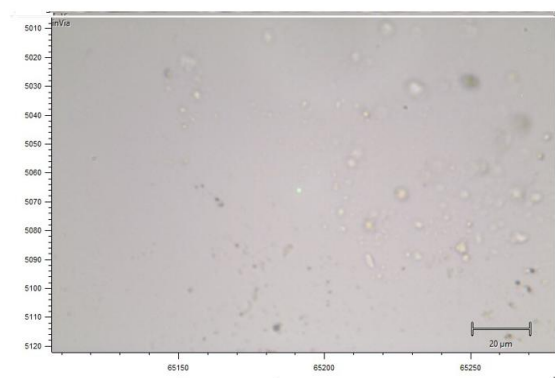

130° C

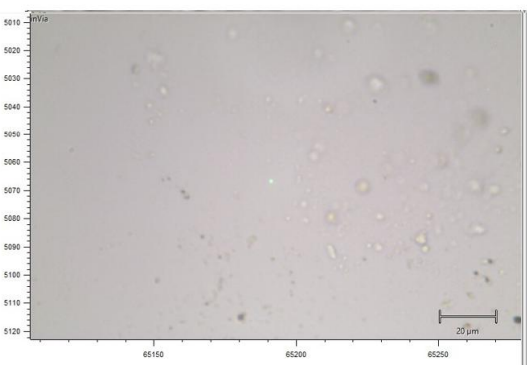

120° C

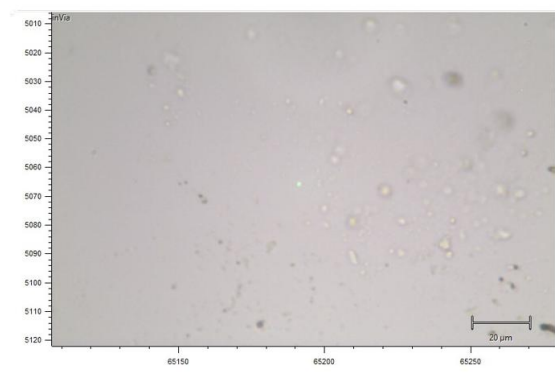

110° C

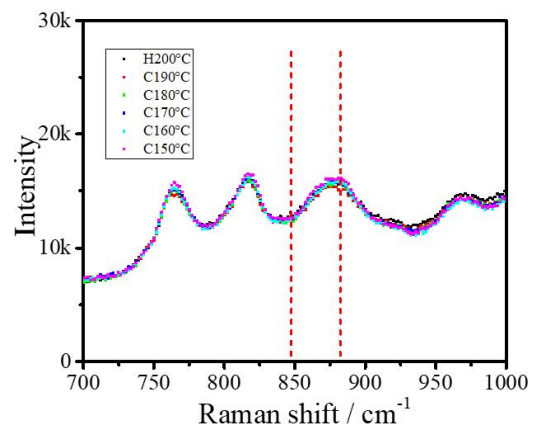

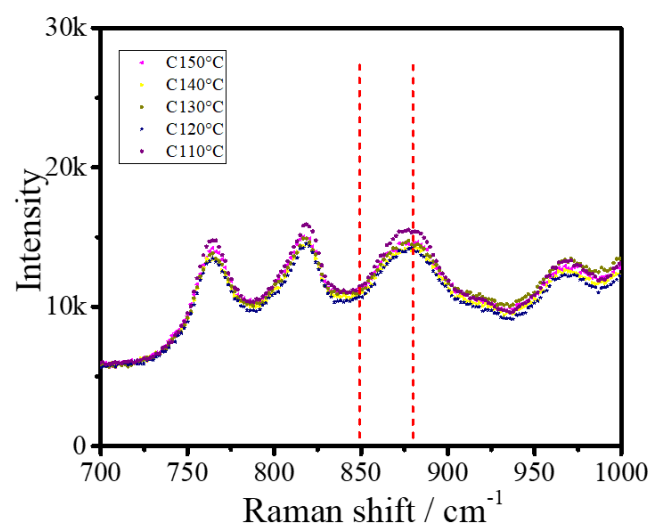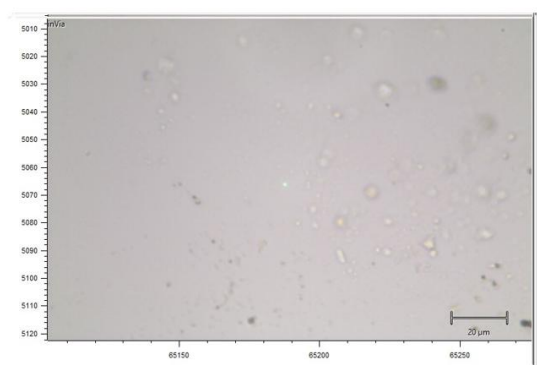

100° C

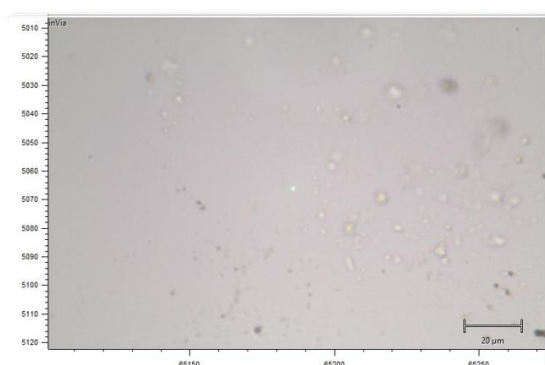

90° C

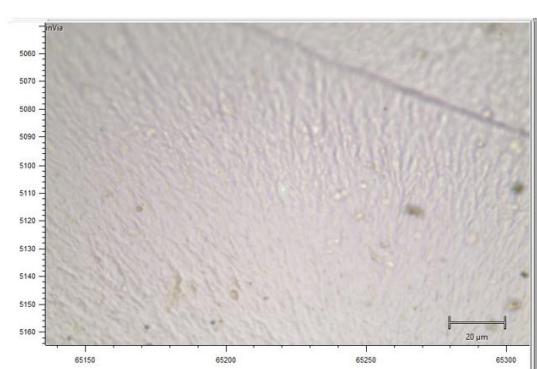

80° C

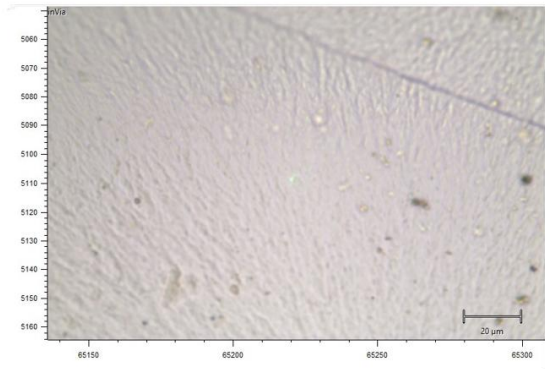

70° C

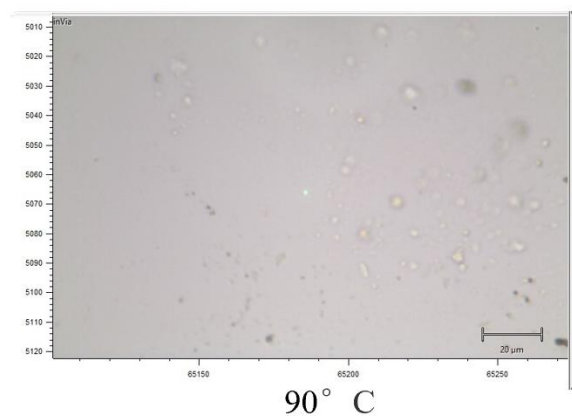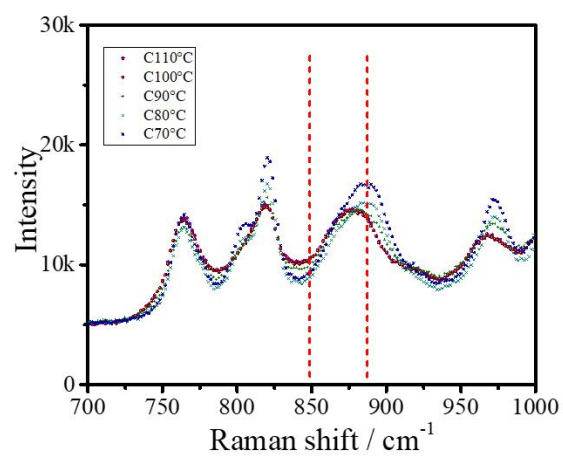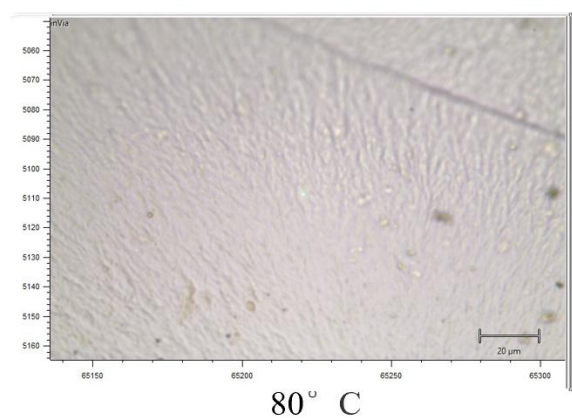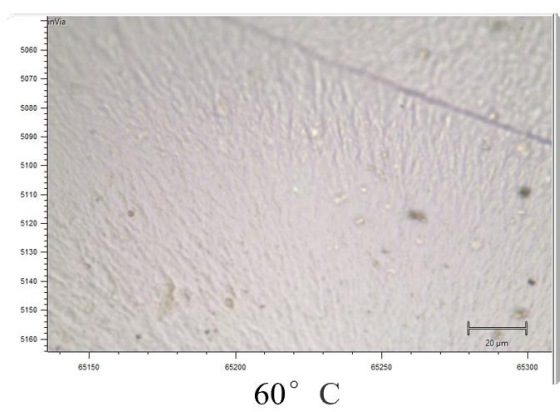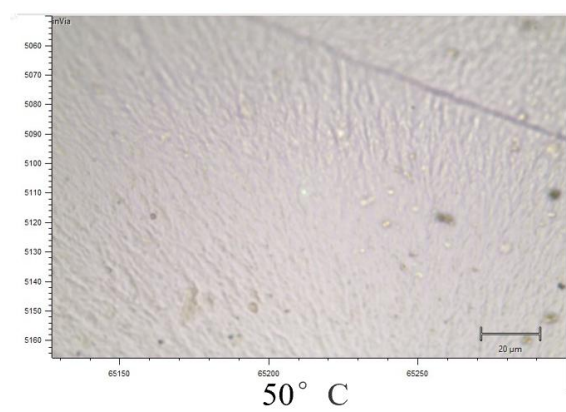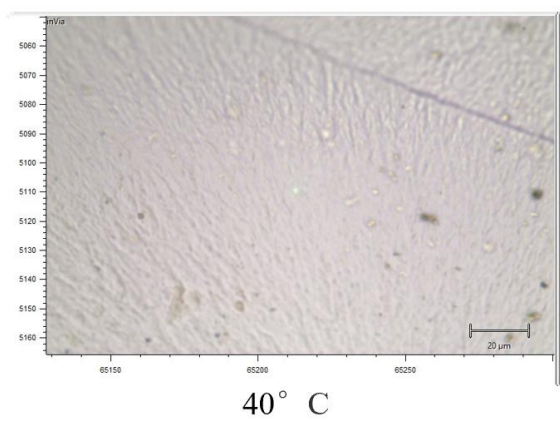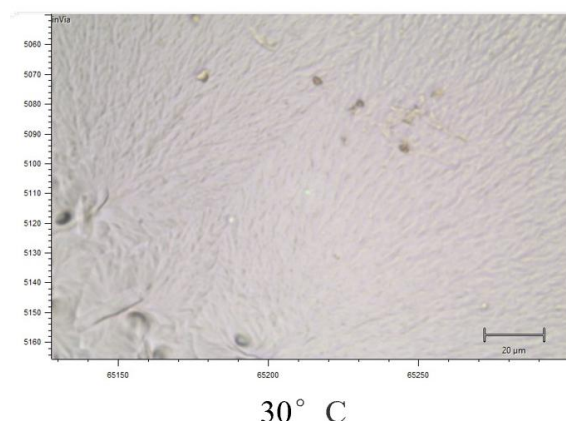



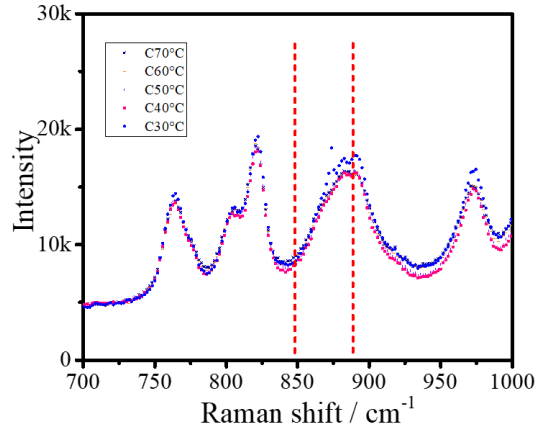

Figure S2 Images and corresponding Raman spectra within the helical sensitive vibrational band range of iPB-1 during cooling

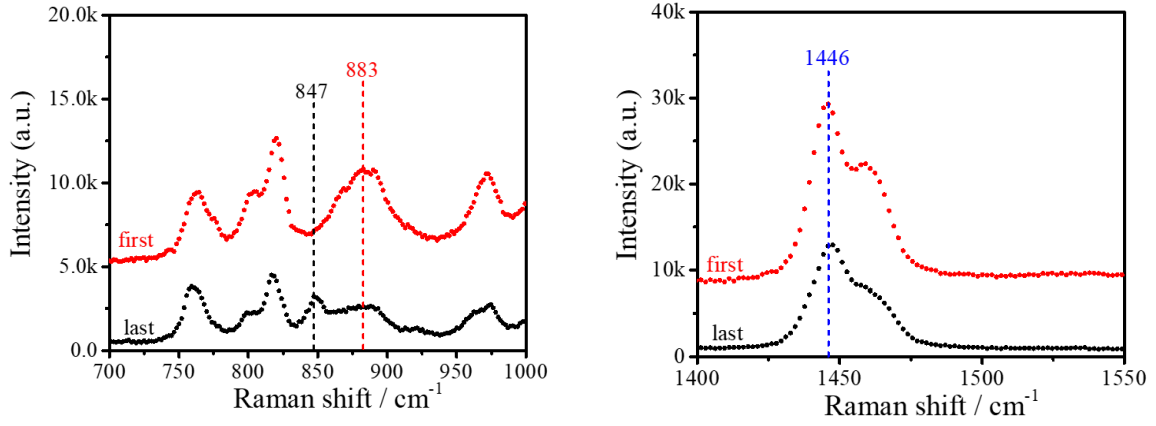

Figure S3 The first and last Raman spectra of iPB-1 during transition within the helical sensitive and unsensitive vibrational band ranges

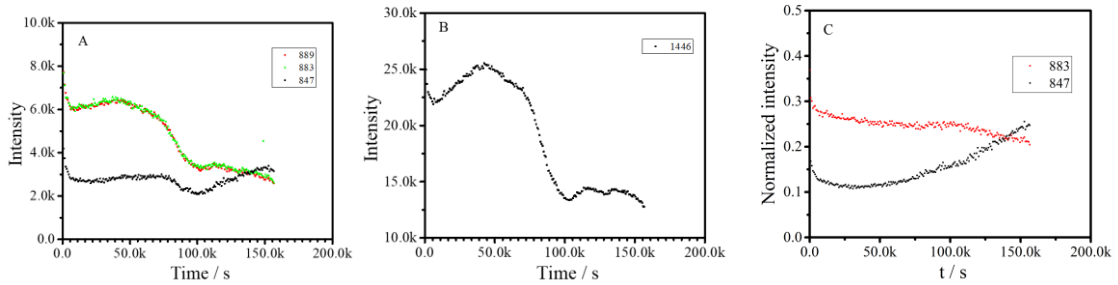

Figure S4 The time related Raman spectra intensity evolution of experimental vibration sensitive and not sensitive to helix angle during the transition (A: Raman shift intensity around band shift 889, 883 and 847  $\text{cm}^{-1}$ , B: Raman shift intensity around band 1446  $\text{cm}^{-1}$ , C: Normalized intensity by the results in Figure S4B)
